# Supplementary material for: Radiomics for predicting grades, isocitrate dehydrogenase mutation, and oxygen 6-methylguanine-DNA methyltransferase promoter methylation of adult diffuse gliomas: combination of structural MRI, apparent diffusion coefficient, and susceptibility-weighted imaging
Source: PubMed Central journal article supplement — Quant Imaging Med Surg. 2024 Nov 29;14(12):9276–89. doi: 10.21037/qims-24-1110 (PMC11652054; doi:10.21037/qims-24-1110), 2024-11-29
Supplement: qims-14-12-9276-supplementary.pdf [file qims-14-12-9276-supplementary.pdf]

## Appendix 1

MRI data in our hospital were acquired using two 3.0T MRI scanners, including Achieva (Philips Medical Systems, Best, Netherlands) and Ingenia (Philips Medical Systems).

Structural MRI: T1WI and T1CE [repetition time (TR)/ echo time (TE) =7.9/3.1 ms; inversion time (TI) =810 ms; flip angle (FA) =10°; matrix =256 × 256; field of view (FOV) =256 × 232 mm<sup>2</sup>; slice thickness =1 mm]. T2WI (TR/TE =2,200/606.36 ms; TI =1,519 ms; FA: from 19° to 150°; matrix=256 × 256; FOV =256 × 232 mm<sup>2</sup>; slice thickness =1 mm). FLAIR (TR/TE =4,800/428.04 ms; TI =1,519 ms; FA: from 21° to 150°; matrix =240 × 240; FOV =256 × 232 mm<sup>2</sup>; slice thickness =1 mm).

DWI (TR/TE =3,598/108 ms; FA =90°; matrix =144 × 144; FOV = 230 × 230 mm<sup>2</sup>; slice thickness =5 mm). ADC map was calculated spontaneously from 2 b-value maps (0 and 1,000). SWI (TR/TE =24/34 ms; FA =17°; matrix =256 × 256; FOV = 240 × 190 mm<sup>2</sup>; slice thickness =2 mm).

The time of all MRI sequences for one patient was 16 min and 42 s.

**Table S1** Features selected in the structural MRI model

| Feature name                                                      |
|-------------------------------------------------------------------|
| T1c_TC.LoG.grlm.RunEntropy                                        |
| T1c_TC.gradient.firstorder.Skewness                               |
| T1c_TC.gradient.grlm.RunEntropy                                   |
| T1c_TC.gradient.glszm.LowGrayLevelZoneEmphasis                    |
| T1c_TC.LoG.firstorder.Entropy                                     |
| T1c_TC.wavelet.LLH.glszm.GrayLevelNonUniformityNormalized         |
| T1c_TC.gradient.firstorder.Entropy                                |
| T1c_TC.gradient.firstorder.Kurtosis                               |
| T1c_TC.wavelet.LLH.gldm.DependenceEntropy                         |
| T1c_TC.gradient.firstorder.90Percentile                           |
| T1c_TC.LoG.glszm.GrayLevelNonUniformityNormalized                 |
| T1c_TC.wavelet.LLH.glszm.GrayLevelNonUniformityNormalized         |
| T1c_TC.wavelet.LLH.grlm.RunEntropy                                |
| T1c_TC.square.firstorder.90Percentile                             |
| T1c_TC.wavelet.LHL.gldm.DependenceEntropy                         |
| T1c_TC.wavelet.LLH.gldm.DependenceEntropy                         |
| T1c_TC.LoG.firstorder.90Percentile                                |
| T1c_wholeTumor.gradient.firstorder.Kurtosis                       |
| T1c_wholeTumor.gradient.glszm.GrayLevelNonUniformityNormalized    |
| T1c_TC.wavelet.LHL.glszm.GrayLevelNonUniformityNormalized         |
| T1c_TC.wavelet.LLH.grlm.RunEntropy                                |
| T1c_wholeTumor.wavelet.LLH.glszm.GrayLevelNonUniformityNormalized |
| T1c_TC.wavelet.LHL.grlm.RunEntropy                                |
| T1c_TC.wavelet.LLH.firstorder.Kurtosis                            |
| T1c_TC.LoG.firstorder.Kurtosis                                    |
| T1c_TC.squareroot.gldm.DifferenceEntropy                          |
| T1c_wholeTumor.LoG.grlm.RunEntropy                                |
| T1c_TC.wavelet.LLH.glszm.ZoneEntropy                              |
| T1c_TC.squareroot.gldm.JointEntropy                               |
| T1c_TC.gradient.gldm.DependenceEntropy                            |
| T1c_wholeTumor.LoG.glszm.GrayLevelNonUniformityNormalized         |
| T1c_wholeTumor.wavelet.LLH.glszm.ZoneEntropy                      |
| T1c_TC.wavelet.LLH.firstorder.10Percentile                        |
| T1c_TC.gradient.ngtdm.Complexity                                  |
| T1c_wholeTumor.original.firstorder.Mean                           |
| T1c_TC.square.gldm.DifferenceEntropy                              |
| T1c_TC.square.grlm.GrayLevelNonUniformityNormalized               |
| T1c_TC.squareroot.firstorder.Entropy                              |
| T1c_TC.wavelet.LLH.glszm.ZoneEntropy                              |
| T1c_TC.lbp.3D.k.firstorder.10Percentile                           |

MRI, magnetic resonance imaging.

**Table S2** Features selected in the ADC model

|                                                                 |
|-----------------------------------------------------------------|
| ADC_TC.original.firstorder.10Percentile                         |
| ADC_TC.square.firstorder.10Percentile                           |
| ADC_wholeTumor.original.firstorder.10Percentile                 |
| ADC_TC.original.firstorder.Mean                                 |
| ADC_TC.squareroot.firstorder.10Percentile                       |
| ADC_wholeTumor.original.shape.Sphericity                        |
| ADC_wholeTumor.original.firstorder.Mean                         |
| ADC_TC.square.firstorder.Median                                 |
| ADC_TC.square.gldm.LargeDependenceHighGrayLevelEmphasis         |
| ADC_TC.square.firstorder.Minimum                                |
| ADC_TC.squareroot.firstorder.Mean                               |
| ADC_TC.log-sigma-3-0-mm-3D.firstorder.90Percentile              |
| ADC_TC.lbp.3D.m1.glszm.HighGrayLevelZoneEmphasis                |
| ADC_TC.lbp.3D.m1.glszm.SmallAreaHighGrayLevelEmphasis           |
| ADC_TC.exponential.firstorder.Minimum                           |
| ADC_wholeTumor.square.firstorder.Median                         |
| ADC_TC.wavelet.LLH.firstorder.Median                            |
| ADC_TC.exponential.grlm.LongRunHighGrayLevelEmphasis            |
| ADC_TC.square.firstorder.Mean                                   |
| ADC_TC.log-sigma-3-0-mm-3D.firstorder.Mean                      |
| ADC_wholeTumor.square.firstorder.10Percentile                   |
| ADC_TC.exponential.gldm.LargeDependenceHighGrayLevelEmphasis    |
| ADC_TC.lbp.3D.m1.grlm.HighGrayLevelRunEmphasis                  |
| ADC_TC.square.grlm.HighGrayLevelRunEmphasis                     |
| ADC_TC.LoG.firstorder.Median                                    |
| ADC_TC.original.shape.Sphericity                                |
| ADC_wholeTumor.square.gldm.LargeDependenceHighGrayLevelEmphasis |
| ADC_TC.lbp.3D.m1.firstorder.90Percentile                        |
| ADC_wholeTumor.squareroot.firstorder.Mean                       |
| ADC_wholeTumor.squareroot.firstorder.10Percentile               |
| ADC_TC.squareroot.firstorder.Skewness                           |
| ADC_wholeTumor.square.grlm.LongRunHighGrayLevelEmphasis         |
| ADC_TC.lbp.3D.k.firstorder.RootMeanSquared                      |
| ADC_TC.wavelet.LLH.firstorder.90Percentile                      |
| ADC_TC.wavelet.LLH.firstorder.Kurtosis                          |
| ADC_wholeTumor.square.firstorder.Mean                           |
| ADC_TC.square.firstorder.Skewness                               |
| ADC_TC.wavelet.LHL.firstorder.90Percentile                      |
| ADC_TC.LoG.firstorder.90Percentile                              |
| ADC_wholeTumor.log-sigma-3-0-mm-3D.firstorder.90Percentile      |

ADC, apparent diffusion coefficient.

**Table S3** Features selected in the SWI model

---

|                                                                          |
|--------------------------------------------------------------------------|
| SWI_TC_wavelet-LHL_glszm_ZoneEntropy                                     |
| SWI_TC_wavelet-HHL_glszm_ZoneEntropy                                     |
| SWI_TC_wavelet-LHL_gldm_DependenceEntropy                                |
| SWI_TC_wavelet-HHL_glcm_MCC                                              |
| SWI_TC_wavelet-HHL_gldm_DependenceEntropy                                |
| SWI_TC_wavelet-LHL_glcm_MCC                                              |
| SWI_TC_Log_firstorder_Maximum                                            |
| SWI_TC_wavelet-LHL_glszm_GrayLevelNonUniformityNormalized                |
| SWI_TC_wavelet-HLL_glcm_MCC                                              |
| SWI_TC_wavelet-HHL_firstorder_10Percentile                               |
| SWI_TC_square_glcm_lmc1                                                  |
| SWI_TC_Log_glcm_MCC                                                      |
| SWI_TC_gradient_glszm_ZoneEntropy                                        |
| SWI_TC_wavelet-LHH_glszm_ZoneEntropy                                     |
| SWI_TC_log-sigma-3-0-mm-3D_firstorder_Maximum                            |
| SWI_TC_wavelet-HLL_firstorder_10Percentile                               |
| SWI_TC_wavelet-HHL_glszm_GrayLevelNonUniformityNormalized                |
| SWI_TC_wavelet-LHL_firstorder_Kurtosis                                   |
| SWI_wholeTumor_Log_firstorder_Maximum                                    |
| SWI_TC_wavelet-LLH_glcm_MCC                                              |
| SWI_TC_wavelet-LLH_firstorder_Skewness                                   |
| SWI_TC_wavelet-HLL_glszm_ZoneEntropy                                     |
| SWI_wholeTumor_Log_glcm_ClusterShade                                     |
| SWI_TC_exponential_glcm_JointEntropy                                     |
| SWI_TC_wavelet-HLL_gldm_DependenceEntropy                                |
| SWI_TC_square_gldm_LargeDependenceHighGrayLevelEmphasis                  |
| SWI_TC_wavelet-LHL_glrIm_RunEntropy                                      |
| SWI_TC_wavelet-LLH_glszm_ZoneEntropy                                     |
| SWI_wholeTumor_gradient_ngtdm_Strength                                   |
| SWI_TC_gradient_firstorder_90Percentile                                  |
| SWI_TC_gradient_gldm_DependenceEntropy                                   |
| SWI_TC_wavelet-LHH_glcm_MCC                                              |
| SWI_wholeTumor_log-sigma-3-0-mm-3D_glszm_SizeZoneNonUniformityNormalized |
| SWI_TC_Log_firstorder_Range                                              |
| SWI_TC_wavelet-HLH_glcm_MCC                                              |
| SWI_TC_Log_glszm_ZoneEntropy                                             |
| SWI_TC_wavelet-LHH_firstorder_10Percentile                               |
| SWI_wholeTumor_wavelet-LHL_glszm_ZoneEntropy                             |
| SWI_wholeTumor_log-sigma-3-0-mm-3D_glszm_SmallAreaHighGrayLevelEmphasis  |
| SWI_TC_wavelet-HLL_firstorder_Maximum                                    |

---

SWI, susceptibility-weighted imaging.

**Table S4** Features selected in model Structural MRI+ADC

---

|                                                                   |
|-------------------------------------------------------------------|
| T1c_TC_Log_glrIm_RunEntropy                                       |
| T1c_TC_gradient_firstorder_Skewness                               |
| T1c_TC_gradient_glrIm_RunEntropy                                  |
| T1c_TC_gradient_glszm_LowGrayLevelZoneEmphasis                    |
| T1c_TC_Log_firstorder_Entropy                                     |
| T1c_TC_wavelet-LLH_glszm_GrayLevelNonUniformityNormalized         |
| T1c_TC_gradient_firstorder_Entropy                                |
| T1c_TC_gradient_firstorder_Kurtosis                               |
| T1c_TC_wavelet-LLH_gldm_DependenceEntropy                         |
| T1c_TC_gradient_firstorder_90Percentile                           |
| T1c_TC_Log_glszm_GrayLevelNonUniformityNormalized                 |
| T1c_TC_wavelet-HLL_glszm_GrayLevelNonUniformityNormalized         |
| T1c_TC_wavelet-LLH_glrIm_RunEntropy                               |
| T1c_TC_square_firstorder_90Percentile                             |
| T1c_TC_wavelet-LHL_gldm_DependenceEntropy                         |
| T1c_TC_wavelet-HLL_gldm_DependenceEntropy                         |
| T1c_TC_Log_firstorder_90Percentile                                |
| T1c_wholeTumor_gradient_firstorder_Kurtosis                       |
| T1c_wholeTumor_gradient_glszm_GrayLevelNonUniformityNormalized    |
| T1c_TC_wavelet-LHL_glszm_GrayLevelNonUniformityNormalized         |
| T1c_TC_wavelet-HLL_glrIm_RunEntropy                               |
| T1c_wholeTumor_wavelet-LLH_glszm_GrayLevelNonUniformityNormalized |
| T1c_TC_wavelet-LHL_glrIm_RunEntropy                               |
| T1c_TC_wavelet-HLL_firstorder_Kurtosis                            |
| T1c_TC_Log_firstorder_Kurtosis                                    |
| ADC_TC_original_firstorder_10Percentile                           |
| ADC_TC_square_firstorder_10Percentile                             |
| ADC_wholeTumor_original_firstorder_10Percentile                   |
| ADC_TC_original_firstorder_Mean                                   |
| ADC_TC_squareroot_firstorder_10Percentile                         |
| ADC_wholeTumor_original_shape_Sphericity                          |
| ADC_wholeTumor_original_firstorder_Mean                           |
| ADC_TC_square_firstorder_Median                                   |
| ADC_TC_square_gldm_LargeDependenceHighGrayLevelEmphasis           |
| ADC_TC_square_firstorder_Minimum                                  |
| ADC_TC_squareroot_firstorder_Mean                                 |
| ADC_TC_log-sigma-3-0-mm-3D_firstorder_90Percentile                |
| ADC_TC_lbp-3D-m1_glszm_HighGrayLevelZoneEmphasis                  |
| ADC_TC_lbp-3D-m1_glszm_SmallAreaHighGrayLevelEmphasis             |
| ADC_TC_exponential_firstorder_Minimum                             |

---

MRI, magnetic resonance imaging; ADC, apparent diffusion coefficient.

**Table S5** Features selected in model Structural MRI+SWI

---

|                                                                   |
|-------------------------------------------------------------------|
| T1c_TC_LoG_glrIm_RunEntropy                                       |
| T1c_TC_gradient_firstorder_Skewness                               |
| T1c_TC_gradient_glrIm_RunEntropy                                  |
| T1c_TC_gradient_glszm_LowGrayLevelZoneEmphasis                    |
| T1c_TC_LoG_firstorder_Entropy                                     |
| T1c_TC_wavelet-LLH_glszm_GrayLevelNonUniformityNormalized         |
| T1c_TC_gradient_firstorder_Entropy                                |
| T1c_TC_gradient_firstorder_Kurtosis                               |
| T1c_TC_wavelet-LLH_gldm_DependenceEntropy                         |
| T1c_TC_gradient_firstorder_90Percentile                           |
| T1c_TC_LoG_glszm_GrayLevelNonUniformityNormalized                 |
| T1c_TC_wavelet-HLL_glszm_GrayLevelNonUniformityNormalized         |
| T1c_TC_wavelet-LLH_glrIm_RunEntropy                               |
| T1c_TC_square_firstorder_90Percentile                             |
| T1c_TC_wavelet-LHL_gldm_DependenceEntropy                         |
| T1c_TC_wavelet-HLL_gldm_DependenceEntropy                         |
| T1c_TC_LoG_firstorder_90Percentile                                |
| T1c_wholeTumor_gradient_firstorder_Kurtosis                       |
| T1c_wholeTumor_gradient_glszm_GrayLevelNonUniformityNormalized    |
| T1c_TC_wavelet-LHL_glszm_GrayLevelNonUniformityNormalized         |
| T1c_TC_wavelet-HLL_glrIm_RunEntropy                               |
| T1c_wholeTumor_wavelet-LLH_glszm_GrayLevelNonUniformityNormalized |
| T1c_TC_wavelet-LHL_glrIm_RunEntropy                               |
| T1c_TC_wavelet-HLL_firstorder_Kurtosis                            |
| T1c_TC_LoG_firstorder_Kurtosis                                    |
| SWI_TC_wavelet-LHL_glszm_ZoneEntropy                              |
| SWI_TC_wavelet-HHL_glszm_ZoneEntropy                              |
| SWI_TC_wavelet-LHL_gldm_DependenceEntropy                         |
| SWI_TC_wavelet-HHL_glcm_MCC                                       |
| SWI_TC_wavelet-HHL_gldm_DependenceEntropy                         |
| SWI_TC_wavelet-LHL_glcm_MCC                                       |
| SWI_TC_LoG_firstorder_Maximum                                     |
| SWI_TC_wavelet-LHL_glszm_GrayLevelNonUniformityNormalized         |
| SWI_TC_wavelet-HLL_glcm_MCC                                       |
| SWI_TC_wavelet-HHL_firstorder_10Percentile                        |
| SWI_TC_square_glcm_lmc1                                           |
| SWI_TC_LoG_glcm_MCC                                               |
| SWI_TC_gradient_glszm_ZoneEntropy                                 |
| SWI_TC_wavelet-LHH_glszm_ZoneEntropy                              |
| SWI_TC_log-sigma-3-0-mm-3D_firstorder_Maximum                     |

---

MRI, magnetic resonance imaging; SWI, susceptibility-weighted imaging.

**Table S6** Features selected in model Structural MRI + ADC + SWI

---

|                                                                |
|----------------------------------------------------------------|
| T1c_TC_LoG_glrIm_RunEntropy                                    |
| T1c_TC_gradient_firstorder_Skewness                            |
| T1c_TC_gradient_glrIm_RunEntropy                               |
| T1c_TC_gradient_glszm_LowGrayLevelZoneEmphasis                 |
| T1c_TC_LoG_firstorder_Entropy                                  |
| T1c_TC_wavelet-LLH_glszm_GrayLevelNonUniformityNormalized      |
| T1c_TC_gradient_firstorder_Entropy                             |
| T1c_TC_gradient_firstorder_Kurtosis                            |
| T1c_TC_wavelet-LLH_gldm_DependenceEntropy                      |
| T1c_TC_gradient_firstorder_90Percentile                        |
| T1c_TC_LoG_glszm_GrayLevelNonUniformityNormalized              |
| T1c_TC_wavelet-HLL_glszm_GrayLevelNonUniformityNormalized      |
| T1c_TC_wavelet-LLH_glrIm_RunEntropy                            |
| T1c_TC_square_firstorder_90Percentile                          |
| T1c_TC_wavelet-LHL_gldm_DependenceEntropy                      |
| T1c_TC_wavelet-HLL_gldm_DependenceEntropy                      |
| T1c_TC_LoG_firstorder_90Percentile                             |
| T1c_wholeTumor_gradient_firstorder_Kurtosis                    |
| T1c_wholeTumor_gradient_glszm_GrayLevelNonUniformityNormalized |
| T1c_TC_wavelet-LHL_glszm_GrayLevelNonUniformityNormalized      |
| ADC_TC_original_firstorder_10Percentile                        |
| ADC_TC_square_firstorder_10Percentile                          |
| ADC_wholeTumor_original_firstorder_10Percentile                |
| ADC_TC_original_firstorder_Mean                                |
| ADC_TC_squareroot_firstorder_10Percentile                      |
| ADC_wholeTumor_original_shape_Sphericity                       |
| ADC_wholeTumor_original_firstorder_Mean                        |
| ADC_TC_square_firstorder_Median                                |
| ADC_TC_square_gldm_LargeDependenceHighGrayLevelEmphasis        |
| ADC_TC_square_firstorder_Minimum                               |
| SWI_TC_wavelet-LHL_glszm_ZoneEntropy                           |
| SWI_TC_wavelet-HHL_glszm_ZoneEntropy                           |
| SWI_TC_wavelet-LHL_gldm_DependenceEntropy                      |
| SWI_TC_wavelet-HHL_glcm_MCC                                    |
| SWI_TC_wavelet-HHL_gldm_DependenceEntropy                      |
| SWI_TC_wavelet-LHL_glcm_MCC                                    |
| SWI_TC_LoG_firstorder_Maximum                                  |
| SWI_TC_wavelet-LHL_glszm_GrayLevelNonUniformityNormalized      |
| SWI_TC_wavelet-HLL_glcm_MCC                                    |
| SWI_TC_wavelet-HHL_firstorder_10Percentile                     |

---

MRI, magnetic resonance imaging; ADC, apparent diffusion coefficient; SWI, susceptibility-weighted imaging.
